# Supplementary material for: Sox17 Regulates Insulin Secretion in the Normal and Pathologic Mouse β Cell
Source: PubMed Central journal article supplement (PMC4140688; doi:10.1371/journal.pone.0104675), 2014-08-21

# Supplementary Figure 10.

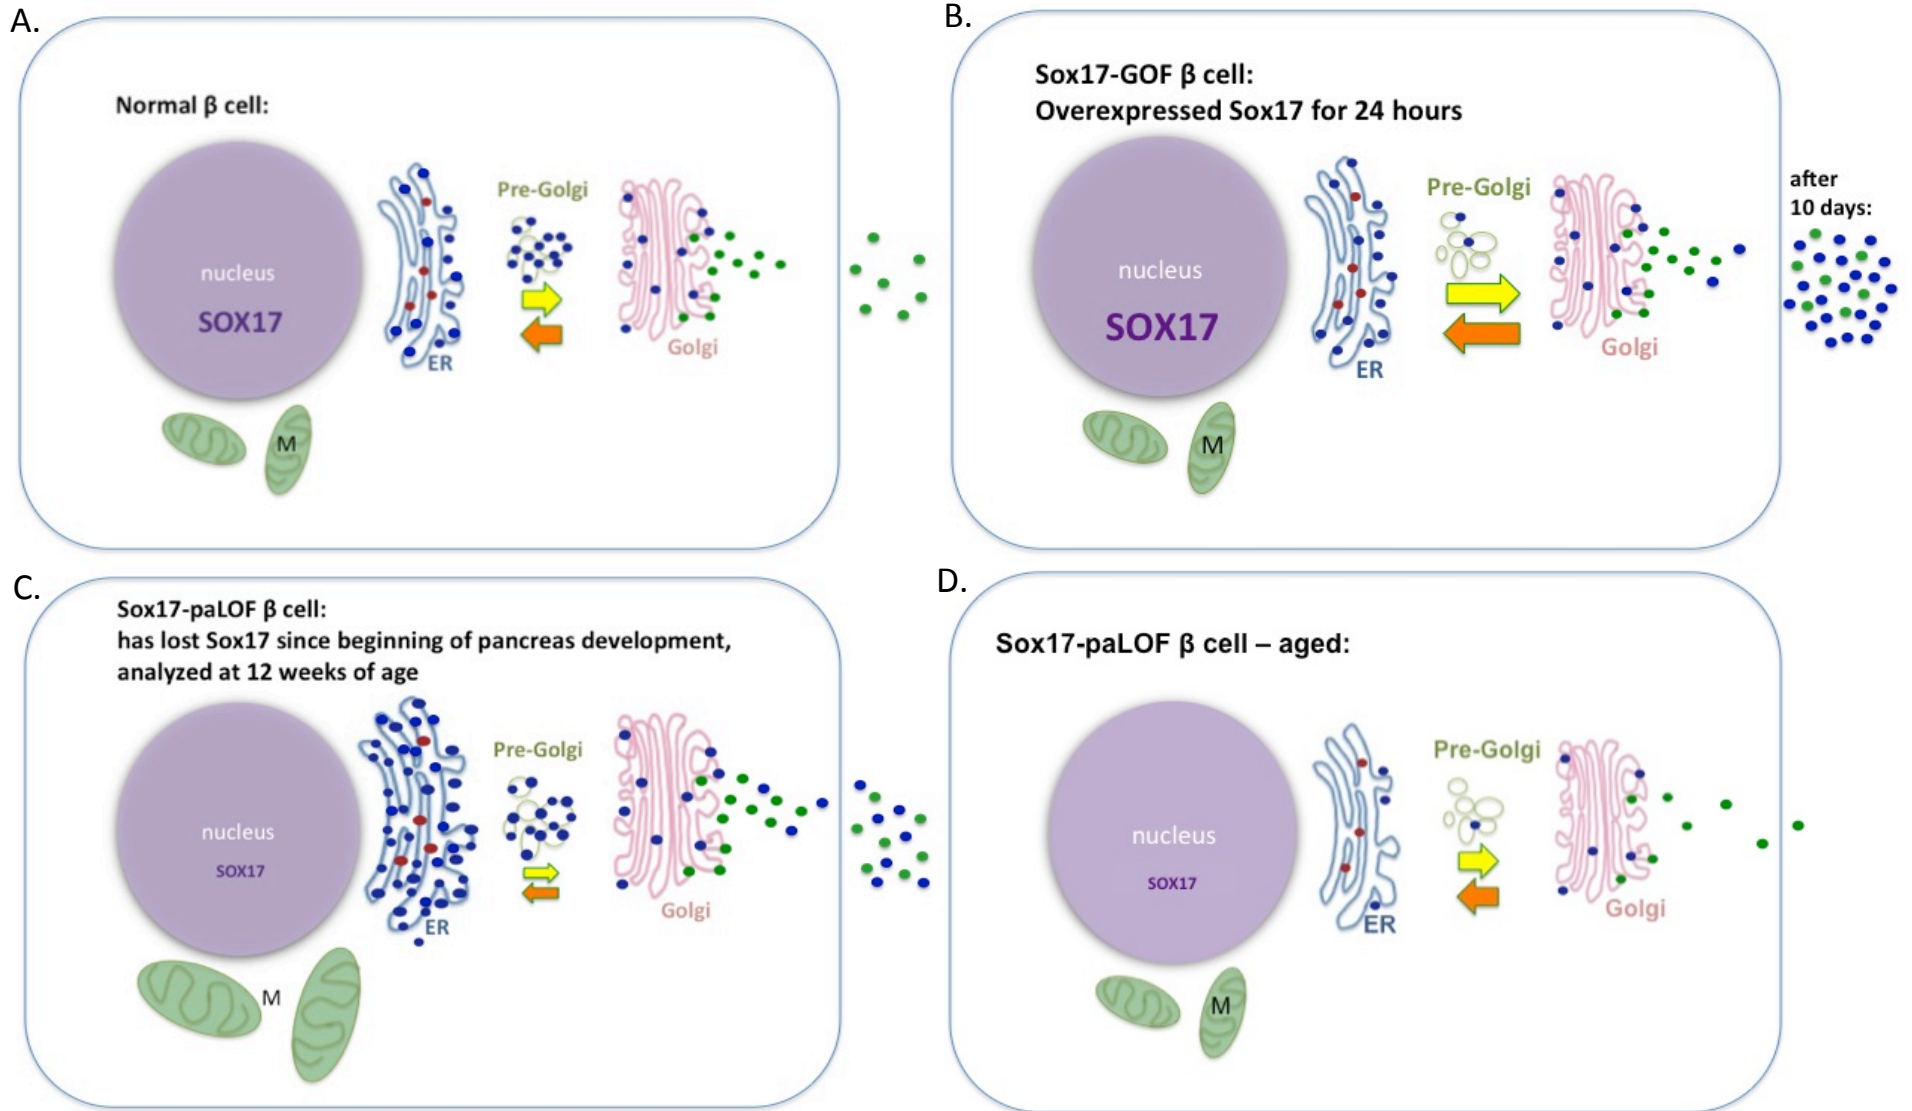

Supplement: pone.0104675.s010.pdf [file pone.0104675.s010.pdf]
